# Supplementary material for: Blood lactate dynamics in awake and anaesthetized mice after intraperitoneal and subcutaneous injections of lactate—sex matters
Source: PeerJ journal article supplement (doi:10.7717/peerj.8328), 2020-01-06
Supplement: Supplementary_Table_1.pdf [file Supplementary_Table_1.pdf]

Supplementary Table 1. Population distribution within treatment groups.

| Isoflurane | Injection   | Number of<br>wildtype/transgenic mice | Number of<br>males/females | Average age<br>(weeks) |
|------------|-------------|---------------------------------------|----------------------------|------------------------|
| -          | Lactate, IP | 3 / 3                                 | 2 / 4                      | 11.9                   |
|            | Lactate, SC | 2 / 4                                 | 3 / 3                      | 12.1                   |
|            | PBS, IP     | 3 / 2                                 | 3 / 2                      | 13.5                   |
|            | PBS, SC     | 4 / 2                                 | 3 / 3                      | 13.5                   |
| +          | Lactate, IP | 3 / 3                                 | 3 / 3                      | 17.0                   |
|            | Lactate, SC | 2 / 4                                 | 3 / 3                      | 15.5                   |
|            | PBS, IP     | 2 / 4                                 | 3 / 3                      | 15.0                   |
|            | PBS, SC     | 2 / 2 (1 n/a) †                       | 3 / 2                      | 15.5                   |

IP – intraperitoneal injection

SC – subcutaneous injection

PBS – phosphate-buffered saline

† 1 n/a refers to one mouse for which genotyping was not performed
